# Supplementary material
Source: publisher figshare collection journal article supplement (https://acs.figshare.com/ndownloader/files/12845240)
Supplement: Supplementary file 1 [file 12845240]

**Supporting Information**

**Ultrafast Energy Transfer Followed by Electron Transfer in a Polymeric Nanoantenna Based Light Harvesting System**

Bikash Jana and Amitava Patra*

Department of Materials Science, Indian Association for the Cultivation of Science, Jadavpur, Kolkata-700032, India

***** Corresponding author’s e- mail: [msap@iacs.res.in](mailto:msap@iacs.res.in) Phone: (91)-33-2473-4971, Fax: (91)-33-2473-2805


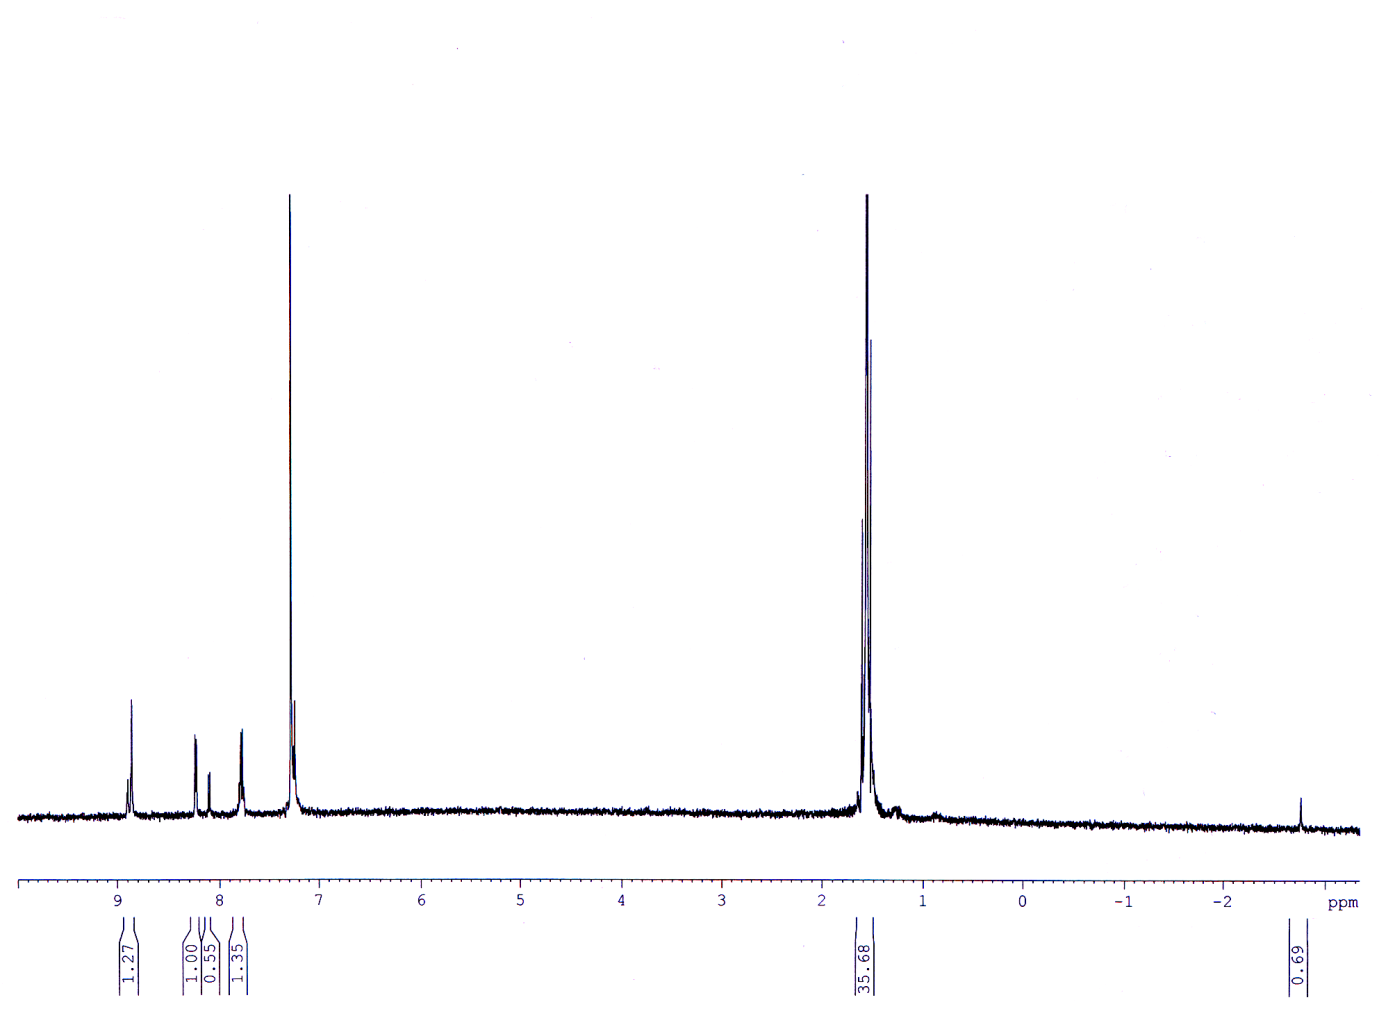


**Figure S1.** 1H NMR (500 MHz, CDCl3) spectrum of HPTP.

**Figure S2.** (A) TEM image of F8BT PNPs, (B) Absorption spectra and (C) Emission spectra (λex=340 nm) of F8BT polymer in THF and water dispersed F8BT PNP, (D) Time resolved emission decays (λex=340 nm, λem=538 nm) of F8BT polymer in THF and F8BT PNP.

**Figure S3:** (A) TEM image and (B) absorption spectrum of BSA capped Au NP.

**Figure S4.** (A) Absorption spectra and (B) Time resolved emission decays (λex=400 nm, λem=655 nm) of HPTP in different environments.

**Figure S5.** (A) Emission spectra (λex = 520 nm) and (B) Fluorescence decay profiles (λex = 405 nm, λem = 655 nm) of HPTP loaded BSA and HPTP loaded BSA capped Au NPs.

**Figure S6.** Normalized absorption spectrum of BSA capped Au NPs (a) and normalized emission spectrum of HPTP loaded BSA.

**Figure S7.** Cyclic voltammogram of HPTP

**Scheme S1**. Relaxation pathway of HPTP in HPTP loaded BSA capped Au NPs upon the excitation at 400 nm.

**Figure S8.** Temporal profiles of fluorescence up-converted signal of HPTP loaded BSA (upper panel) and HPTP loaded BSA capped Au NPs (lower panel) (λex 400 nm, λem 655 nm).

**Figure S9.** DLS distribution of F8BT PNP, BSA protein and F8BT-BSA complex

**Figure S10.** Absorption spectra of F8BT PNP, F8BT-BSA complex and F8BT-HPTP loaded BSA complex.

**Figure S11.** Emission spectra of F8BT PNPs-BSA complex with increasing the concentration of HPTP (0-1.22 µM) (a-f) upon excitation at 340 nm

**Figure S12.** Fluorescence decay profiles of (A) F8BT-BSA complex measured for the emission of F8BT (λex = 340 nm, λem = 538 nm) in absence (a) and presence of HPTP (b), and (B) HPTP loaded BSA (λem = 655 nm) with direct excitation (λex = 405 nm) (a) and F8BT- HPTP loaded BSA complex (λem = 655 nm) with the donor excitation (λex = 340 nm) (b). Inset shows the initial enhancement of HPTP with the donor excitation.

**Figure S13.** Transient absorption spectra of F8BT PNP (λex 340 nm) with different delay times

**Figure S14.** Normalized bleach recovery kinetics at 460 nm of F8BT PNP (a) and F8BT-HPTP loaded BSA complex (b) (λex 340 nm).

**Figure S15.** Absorption spectra of F8BT PNP, F8BT-BSA complex and F8BT-HPTP loaded BSA complex, F8BT-BSA capped Au NPs, and triad.

**Figure S16.** Emission spectra of water dispersed F8BT PNPs (a), F8BT- HPTP (1.22 µM) loaded BSA complex (b), F8BT-BSA capped Au NPs hybrid (c) and triad (d) upon excitation at 340 nm.

**Figure S17.** Temporal profiles of fluorescence up-converted signal of F8BT PNPs and F8BT-BSA capped Au NPs (λex = 400 nm, λem = 538 nm).

**Figure S18.** Transient absorption spectra of F8BT PNP-BSA capped Au NP hybrid (λex 340 nm) with different delay times

**Figure S19.** Normalized bleach recovery kinetics at 460 nm of F8BT PNP and F8BT PNP-BSA capped Au NPs hybrid (λex 340 nm).

**Figure S20.** Cyclic voltammogram of F8BT PNP.

**Scheme S2**: Band position of F8BT PNP and work function of Au NP.

**Figure S21.** Temporal profiles of fluorescence up-converted signal of F8BT PNPs and triad (λex = 400 nm, λem = 538 nm).

**Figure S22.** Temporal profile of fluorescence up-converted signal of HPTP in the triad (λex = 450 nm, λem = 655 nm).


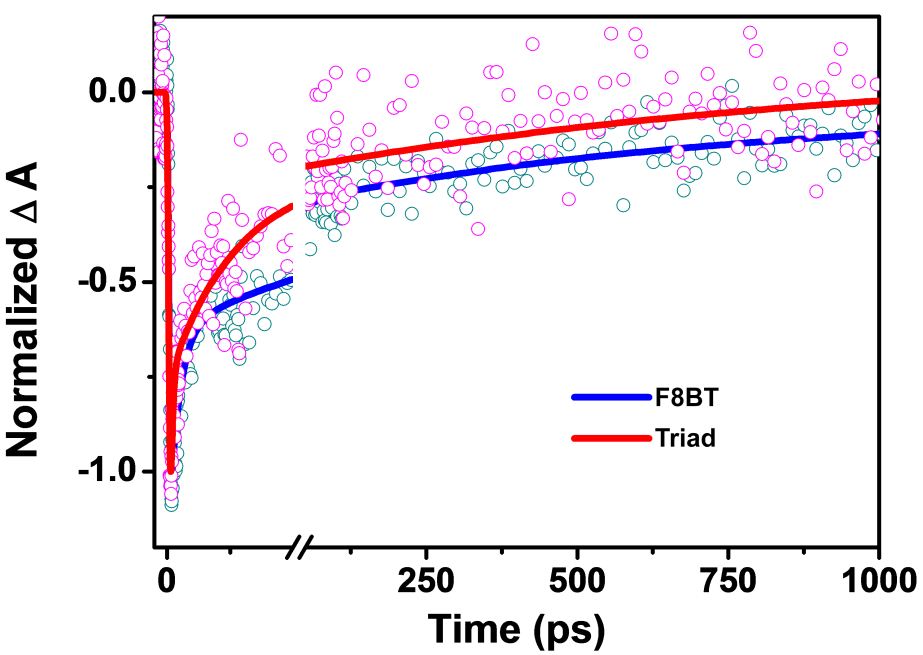


**Figure S23.** Normalized bleach recovery kinetics at 460 nm in F8BT PNP and in triad (λex 340 nm).

**Figure S24.** (A) Emission spectra of F8BT PNPs (a), F8BT PNPs- BSA capped Au NPs hybrid with increasing the concentration of HPTP (0-1.22 µM) (b-g) [inset shows the enlarge view in the change in emission spectra of F8BT PNPs- BSA capped Au NPs hybrid with increasing the concentration of HPTP] and (B) Emission spectra of F8BT PNPs (a), F8BT PNPs-BSA complex with increasing the concentration of Au NPs (0-120 nM) (b-g) upon excitation at 340 nm [inset shows the enlarge view in the change in emission spectra of F8BT PNPs-BSA complex with increasing the concentration of Au NPs].

**Tables**:

**Table S1:** Time resolved emission decay data of F8BT polymer in THF and F8BT PNPs dispersed in water.

| System | λex (nm) | λem (nm) | τ1 (a1) [ns] | τ2 (a2) [ns] | τ3 (a3) [ns] | <τ> [ns] |
| --- | --- | --- | --- | --- | --- | --- |
| F8BT in THF | 340 | 538 | 0.22 (0.07) | 2.72 (0.93) | - | 2.54 |
| F8BT PNP | 340 | 538 | 0.26 (0.48) | 1.01 (0.51) | 1.95 (0.01) | 0.66 |

**Table S2:** Time resolved emission decay data of HPTP in different environments.

| System | λex (nm) | λem (nm) | τ1 (a1) [ns] | τ2 (a2) [ns] | <τ> [ns] |
| --- | --- | --- | --- | --- | --- |
| HPTP in EtOH |  | 651 | - | 9.33 (1.0) | 9.33 |
| HPTP in Water | 405 | 655 | 0.25 (0.85) | 0.9 (0.15) | 0.35 |
| HPTP inside BSA |  | 655 | 1.21 (0.67) | 10.65 (0.33) | 4.33 |

**Table S3:** Time resolved emission decay data of F8BT in F8BT PNPs and in F8BT-HPTP loaded BSA complex (λex 340 nm; λem 538 nm).

| System | τ1 (a1) [ns] | τ2 (a2) [ns] | τ3 (a3) [ns] | <τ> [ns] |
| --- | --- | --- | --- | --- |
| F8BT PNP | 0.26 (0.48) | 1.01 (0.51) | 1.95 (0.01) | 0.66 |
| F8BT-HPTP loaded BSA | <0.10 (0.99) | 0.79 (0.01) | - | - |

**Table S4:** Time resolved emission decay data HPTP in HPTP loaded BSA, F8BT- HPTP loaded BSA complex, HPTP loaded BSA capped Au NPs and triad (λem 655 nm).

| System | λex (nm) | τ1 (a1) [ns] | τ2 (a2) [ns] | τ3 (a3) [ns] | <τ> [ns] |
| --- | --- | --- | --- | --- | --- |
| HPTP loaded BSA | 405 | 1.21 (0.67) | 10.65 (0.33) |  | 4.33 |
| F8BT-HPTP loaded BSA | 340 | 1.65 (0.38) | 9.71 (0.62) |  | 6.65 |
| HPTP loaded BSA capped Au NPs | 405 | 2.30 (0.39) | 10.35 (0.09) | 0.66 (0.52) | 2.17 |
| Triad | 340 | 3.43 (0.02) | 10.48 (0.03) | 0.21 (0.95) | 0.58 |

**Table S5:** Kinetic fitting parameters for bleach recovery at 460 nm for F8BT PNPs and F8BT-HPTP loaded BSA complex (λex 340 nm).

| System | τ1 (a1) [fs] | τ2 (a2) [ps] | τ3 (a3) [ps] |
| --- | --- | --- | --- |
| F8BT PNP | 819 (0.47) | 19.03 (0.30) | 777.6 (0.23) |
| F8BT-HPTP loaded BSA | 156 (0.27) | 0.987 (0.33) | 14.69 (0.40) |

**Table S6:** Ultrafast femtosecond fluorescence decay parameters of F8BT in F8BT PNPs, F8BT-HPTP loaded BSA complex, F8BT-BSA capped Au NPs hybrid and triad (λex 400 nm; λem 538 nm).

| System | τ1 (a1) [ps] | τ2 (a2) [ps] |
| --- | --- | --- |
| F8BT PNP | 6.81 (0.14) | 249 (0.86) |
| F8BT-HPTP loaded BSA | 6.14 (0.33) | 75.4 (0.67) |
| F8BT-BSA capped Au NPs hybrid | 6.81(0.14) | 152.4 (0.86) |
| Triad | 6.16 (0.25) | 93.96 (0.75) |

**Table S7:** Ultrafast femtosecond fluorescence decay parameters of HPTP in F8BT-HPTP loaded BSA complex (λex 450 nm; λem 655 nm).

| System | τ1 (a1) [fs] | τ2 (a2) [ps] |
| --- | --- | --- |
| F8BT-HPTP loaded BSA | -136 (1.0) | 134.4 (1.0) |

**Table S8:** Kinetic fitting parameters for bleach recovery at 420 nm for HPTP in F8BT-HPTP loaded BSA complex and in triad (λex 340 nm).

| System | τ1 (a1) [ps] | τ2 (a2) [ns] | τ3 (a3) [ps] |
| --- | --- | --- | --- |
| F8BT-HPTP loaded BSA | -2.7 (1.0) | ~ 1 (1.0) | - |
| Triad | -2.7 (1.0) | ~ 1 (0.50) | 71.66 (0.50) |
